# Supplementary material
Source: ML conference proceedings conference paper supplement (https://openreview.net/forum?id=aXuWowhIYt)

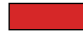

Mooij et al. (2020)

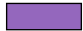

Squires et al. (2022)

Supplement: supplementary_material [file attachment]

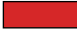

Mooij

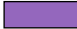

Squires

Supplement: supplementary_material [file attachment]
